# Rapid encoding of task regularities in the human hippocampus guides sensorimotor timing

**Ignacio Polti<sup>1,2,\*</sup>, Matthias Nau<sup>1,2,\*</sup>, Raphael Kaplan<sup>1,3</sup>,  
Virginie van Wassenhove<sup>4</sup>, and Christian F. Doeller<sup>1,2,5</sup>**

<sup>1</sup>Kavli Institute for Systems Neuroscience, Centre for Neural Computation, The Egil and Pauline Braathen and Fred Kavli Centre for Cortical Microcircuits, Jebsen Centre for Alzheimer's Disease, Norwegian University of Science and Technology, Trondheim, Norway

<sup>2</sup>Max-Planck-Institute for Human Cognitive and Brain Sciences, Leipzig, Germany

<sup>3</sup>Department of Basic Psychology, Clinical Psychology, and Psychobiology, Universitat Jaume I, Castellón de la Plana, Spain

<sup>4</sup>CEA DRF/Joliot, NeuroSpin; INSERM, Cognitive Neuroimaging Unit; CNRS, Université Paris-Saclay, Gif-Sur-Yvette, France

<sup>5</sup>Institute of Psychology, Leipzig University, Leipzig, Germany

*\*Shared-first authors*

## Abstract

The brain encodes the statistical regularities of the environment in a task-specific yet flexible and generalizable format. Here, we seek to understand this process by converging two parallel lines of research, one centered on sensorimotor timing, and the other on cognitive mapping in the hippocampal system. By combining functional magnetic resonance imaging (fMRI) with a fast-paced time-to-contact (TTC) estimation task, we found that the hippocampus signaled behavioral feedback received in each trial as well as performance improvements across trials along with reward-processing regions. Critically, it signaled performance improvements independent from the tested intervals, and its activity accounted for the trial-wise regression-to-the-mean biases in TTC estimation. This suggests that the hippocampus supports the rapid encoding of temporal context even on short time scales in a behavior-dependent manner. Our results emphasize the central role of the hippocampus in statistical learning and position it at the core of a brain-wide network updating sensorimotor representations in real time for flexible behavior.

# Introduction

When someone throws us a ball, we can anticipate its future trajectory, its speed and the time it will reach us. These expectations then inform the motor system to plan an appropriate action to catch it. Generating expectations and planning behavior accordingly builds on our ability to learn from past experiences and to encode the statistical regularities of the tasks we perform. At the core of this ability lies a continuous perception-action loop, initially proposed for sensorimotor systems (e.g. [Wolpert et al. \(2011\)](#)), which is now at the heart of many leading theories of brain function including active inference ([Friston et al., 2016](#)), predictive coding ([Huang & Rao, 2011](#)) and reinforcement learning ([Daw & Dayan, 2014](#)).

Critically, the brain needs to balance three primary objectives to effectively guide behavior in a dynamic environment. First, it needs to capture the specific aspects of the task that inform the relevant behavior (e.g. the remaining time to catch the ball). Second, it needs to generalize from a limited set of examples to novel and noisy situations. This can be achieved by regularizing the currently encoded information based on past experiences (e.g. by inferring how fast previous balls flew on average). Third, the sensorimotor representations that guide the behavior need to be updated flexibly whenever feedback about our actions becomes available (e.g. when we catch or miss the ball), or when task demands change (e.g. when someone throws us a frisbee instead). Herein, we refer to these objectives as specificity, regularization and flexibility. While these are all fundamental principles underlying human cognition broadly, how the brain forms and continuously updates sensorimotor representations that balance these three objectives remains unclear.

Here, we approach this question with a new perspective by converging two parallel lines of research centered on sensorimotor timing and hippocampal-dependent cognitive mapping. Specifically, we test how the human hippocampus, an area implicated in memory formation on long time scales (days to weeks), may support the formation and flexible updating of sensorimotor representations even on short time scales (milliseconds to seconds). We do so by characterizing in detail the relationship between hippocampal activity and behavioral performance in a fast-paced timing task, which is traditionally believed to be hippocampal-independent. We propose that the capacity of the hippocampus to encode statistical regularities of our environment ([Behrens et al., 2018](#); [Momennejad, 2020](#); [Whittington et al., 2020](#)) situates it at the core of a brain-wide network balancing specificity vs. regularization in real time as the relevant behavior is performed.

An optimal behavioral domain to study these processes is sensorimotor timing ([Gershman et al., 2014](#); [Petter et al., 2018](#)). This is because prior work suggested that timing estimates indeed rely on the statistics of prior experiences ([Wolpert et al., 2011](#); [Jazayeri & Shadlen, 2010](#); [Acerbi et al., 2012](#); [Chang & Jazayeri, 2018](#)). Crucially, however, timing estimates are not always accurate. Instead, they directly reflect the trade-off between specificity and regularization, which is expressed in systematic behavioral biases. Estimated intervals regress towards the mean of the distribution of tested intervals ([Jazayeri & Shadlen, 2010](#)), a well-known effect that we will refer to as the regression effect ([Petzschner et al., 2015](#)). The regression effect suggests that the brain encodes a probability distribution of possible intervals rather than the exact information obtained in each trial ([Wolpert et al., 2011](#)). Timing estimates therefore depend not only on the interval tested in a trial, but also on the temporal context in which they were encountered (i.e., the intervals tested in all other trials). This likely helps to predict future scenarios, to adapt behavior flexibly and to generalize to novel or noisy situations ([Jazayeri & Shadlen, 2010](#); [Acerbi et al., 2012](#); [Roach et al., 2017](#)).

Importantly, the hippocampus proper codes for time and temporal context on various scales ([Howard, 2017](#)) and it has been shown to process behavioral feedback in decision-making tasks ([Shohamy](#)

& Wagner, 2008), pointing to a role in feedback learning. Moreover, the hippocampal formation has been implicated in encoding the latent structure of a task along with the individual features that were tested (Kumaran, 2012; Schlichting & Preston, 2015; Schapiro et al., 2017; Wikenheiser et al., 2017; Behrens et al., 2018; Schuck & Niv, 2019; Whittington et al., 2020; Peer et al., 2021), providing a unified account for its many proposed roles in navigation (Burgess et al., 2002), memory (Schiller et al., 2015; Eichenbaum, 2017) and decision making (Kaplan et al., 2017; Vikbladh et al., 2019). We propose that a central function of the human hippocampus is to encode the temporal context of stimuli and behaviors rapidly, and that this process manifests as the behavioral regression effect observed in time estimation and other domains (Petzschner et al., 2015). This puts the hippocampus at the core of a brain-wide network solving the trade-off between specificity and regularization for flexible behavior by continuously updating sensorimotor representations in a feedback-dependent manner. Using functional magnetic resonance imaging (fMRI) and a sensorimotor timing task, we here test this proposal empirically.

## Results

In the following, we present our experiment and results in four steps. First, we introduce our task, which built on the estimation of the time-to-contact (TTC) between a moving fixation target and a visual boundary, as well as the behavioral and fMRI measurements we acquired. On a behavioral level, we show that participants' timing estimates systematically regress towards the mean of the tested intervals. Second, we demonstrate that hippocampal fMRI activity and functional connectivity tracks the behavioral feedback participants received in each trial, revealing a link between hippocampal processing and timing-task performance. Third, we show that this hippocampal feedback modulation reflects improvements in behavioral performance over trials. We interpret this activity to signal the updating of task-relevant sensorimotor representations in real time. Fourth, we show that these hippocampal updating signals were independent of the specific interval that was tested and reflected the magnitude of the behavioral regression effect in each trial.

Notably, for each of the hippocampal main analyses, we also performed whole-brain voxel-wise analyses to uncover the larger brain network at play. We found that in addition to the hippocampus, regions typically associated with timing and reward processing signaled sensorimotor updating in our task, particularly the striatum. Follow-up analyses further revealed a striking distinction in TTC-specific and TTC-independent updating signals between striatal sub-regions. We conclude by discussing the potential neural underpinnings of these results and how the hippocampus may contribute to solving the trade-off between task specificity and regularization in concert with this larger brain network.

### Time-to-contact (TTC) estimation task

We monitored whole-brain activity using fMRI with concurrent eye tracking in 34 participants performing a TTC task. This task offered a rich behavioral read-out and required sustained attention in every single trial. During scanning, participants visually tracked a fixation target, which moved on linear trajectories within a circular boundary. The target moved at one of four possible speed levels and in one of 24 possible directions (Fig. 1A, similar to Nau et al. (2018a)). The sequence of tested speeds was counterbalanced across trials. Whenever the target stopped moving, participants estimated when the target would have hit the boundary if it had continued moving. They did so while maintaining fixation, and they indicated the estimated TTC by pressing a button. Feedback about their performance was provided foveally and instantly with a colored cue. The received feedback

depended on the timing error, i.e. the difference between objectively true and estimated TTC (Figs. 1B), and it comprised 3 levels reflecting high, middle and low accuracy (Fig. 1C). Because timing judgements typically follow the Weber-Fechner law (Rakitin et al., 1998), the feedback levels were scaled relative to the ground-truth TTC of each trial. This ensured that participants were exposed to approximately the same distribution of feedback at all intervals tested (Figs. 1C, S1B). After a jittered inter-trial interval (ITI), the next trial began and the target moved into another direction at a given speed. The tested speeds of the fixation target were counterbalanced across trials to ensure a balanced sampling within each scanning run. Because the target always stopped moving at the same distance to the boundary, matching the boundary's retinal eccentricity across trials, the different speeds led to four different TTCs: 0.55, 0.65, 0.86 and 1.2 seconds. Each participant performed a total of 768 trials. Please see Methods for more details.

### A) Visual tracking & time-to-contact (TTC) estimation

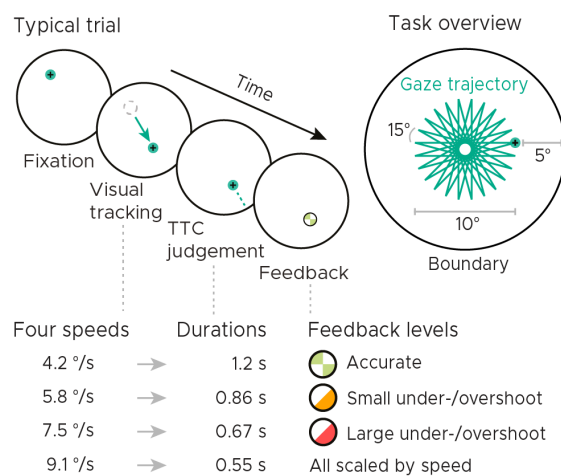

**Figure 1: Visual tracking and Time-To-Contact (TTC) estimation task.** A) Task design. In each trial during fMRI scanning, participants fixated a target (phase 1), which started moving at one of 4 possible speeds and in one of 24 possible directions for 10° visual angle (phase 2). After the target stopped moving, participants kept fixating and estimated when the fixation target would have hit a boundary 5° visual angle apart (phase 3). After pressing a button at the estimated TTC, participants received feedback (phase 4) according to their performance. Feedback was scaled relative to target TTC. B) Task performance. True and estimated TTC were correlated, showing that participants performed the task well. However, they overestimated short TTCs and underestimated long TTCs. Their estimates regressed towards the grand-mean of the TTC distribution (horizontal dashed line), away from the line of equality (diagonal dashed line). C) Feedback. On average, participants received high-accuracy feedback on half of the trials (also see Fig. S1B). BC) We plot the mean and SEM (black dots and lines) as well as single-participant data as dots. Feedback levels are color coded.

### B) TTC-task performance

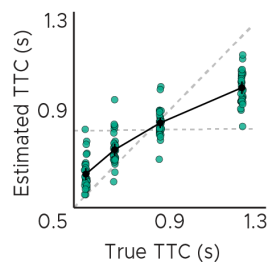

### C) Received feedback

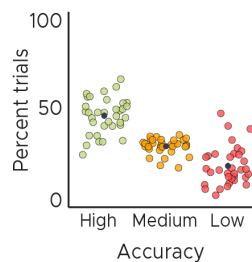

Analyzing the behavioral responses revealed that participants performed the task well and that the estimated and true TTCs were tightly correlated (Fig. 1B; Spearman's  $\rho = 0.91, p = 2.2 \times 10^{-16}$ ). However, participants' responses were also systematically biased towards the grand mean of the TTC distribution (0.82 seconds), indicating that shorter durations tended to be overestimated and longer durations tended to be underestimated. We confirmed this in all participants by examining the slopes of linear regression lines fit to the behavioral responses (Fig. S1C). These slopes differed from 1 (veridical performance; Fig. 1B, diagonal dashed line; one-tailed one-sample  $t$  test,  $t(33) = -19.26, p = 2.2 \times 10^{-16}, d = -3.30, CI : [-4.22, -2.47]$ ) as well as from 0 (grand mean; Fig. 1B, horizontal dashed line; one-tailed one-sample  $t$  test,  $t(33) = 21.62, p = 2.2 \times 10^{-16}, d = 3.71, CI : [2.79, 4.72]$ ) and clustered at 0.5. Moreover, the slopes also correlated positively with behavioral accuracy across participants (Fig. S1D; Spearman's  $\rho = 0.794, p = 2.1 \times 10^{-08}$ ), consistent with previous re-

ports (Cicchini et al., 2012). Notably, the regression effect we observed in behavior has been argued to show that timing estimates indeed rely on the latent task regularities that our brain has encoded (e.g. Jazayeri & Shadlen (2010); Roach et al. (2017)). It may therefore reflect a key behavioral adaptation helping to regularize encoded intervals to optimally support both current task performance and generalization to future scenarios. In support of this, participants' regression slopes converged over time towards the value of 0.5, i.e. the slope value between veridical performance and the grand mean (Fig. S1E; linear mixed-effects model with task segment as a predictor and participants as the error term,  $F(1) = 8.172, p = 0.005, \epsilon^2 = 0.08, CI : [0.01, 0.18]$ ). Visualizing the timing error over task segments and trials further showed that participants' task performance improved over time (Fig. S1F; linear mixed-effects model with task segment as a predictor and participants as the error term,  $F(1) = 15.127, p = 1.3 \times 10^{-4}, \epsilon^2 = 0.06, CI : [0.02, 0.11]$ ), which suggests they were learning over the course of the experiment.

### Behavioral feedback predicts hippocampal activity

Importantly, sensorimotor updating is expected to occur right after the value of the performed action became apparent, which is when participants received feedback. As a proxy, we therefore analyzed how activity in each voxel reflected the feedback participants received in the previous trial. Using a mass-univariate general linear model (GLM), we modeled the three feedback levels with one regressor each (high, medium, low) plus additional nuisance regressors (see methods for details). We then contrasted the beta weights estimated for high-accuracy vs. low-accuracy feedback and examined the effects on group-level averaged across runs.

In both our regions-of-interest (ROI) analysis and a voxel-wise analysis, we found that hippocampal activity could indeed be predicted by the feedback participants received in the past trial (Figs. 2A, B). Higher-accuracy feedback resulted in overall stronger activity in the anterior section of the hippocampus (Figs. 2B, S2A; two-tailed one-sample  $t$  tests: anterior HPC,  $t(33) = -3.80, p = 5.9 \times 10^{-4}, p_{fwe} = 0.001, d = -0.65, CI : [-1.03, -0.28]$ ; posterior HPC,  $t(33) = -1.60, p = 0.119, p_{fwe} = 0.237, d = -0.27, CI : [-0.62, 0.07]$ ). Moreover, the voxel-wise analysis revealed similar feedback-related activity in the thalamus and the striatum (Fig. 2A), and in the hippocampus when the feedback of the current trial was modeled (Fig. S3). Note that there was no systematic relationship between subsequent trials on a behavioral level (Fig. S1A; two-tailed one-sample  $t$  test;  $t(33) = 1.03, p = 0.312, d = 0.18, CI : [-0.17, 0.52]$ ; see methods for details) and that the direction of the effects differed across regions (Fig 2A), speaking against potential feedback-dependent biases in attention. Instead, these results are consistent with the notion that hippocampal activity signals the updating of task-relevant sensorimotor representations in real time.

### Feedback-dependent hippocampal functional connectivity

Having established that hippocampal activity reflected feedback in the TTC task, we reasoned that its activity may also show systematic co-fluctuations with other task-relevant brain regions as well. To test this, we estimated the functional connectivity of a 4 mm radius sphere centered on the hippocampal peak main effect ( $x=-32, y=-14, z=-14$ ) using a seed-based psychophysiological interaction (PPI) analysis (see methods). We reasoned that larger timing errors and therefore low-accuracy feedback would result in stronger updating compared to smaller timing errors and high-accuracy feedback, a relationship that should also be reflected in the functional connectivity between the hippocampus and other regions. We specifically tested this using the PPI analysis by contrasting trials in which participants performed poorly compared to those trials in which they performed well.

### A) Wide-spread brain activity reflects feedback received in past trial

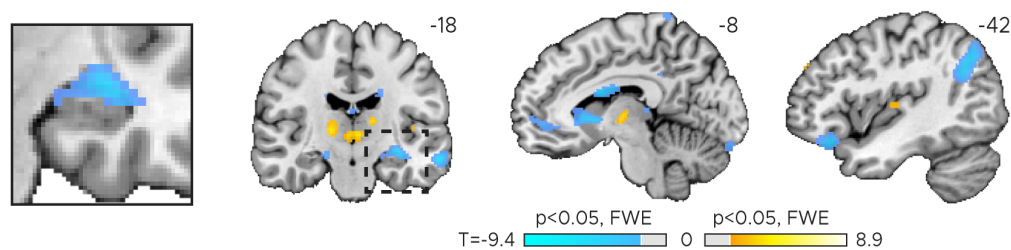

### B) ROI analysis

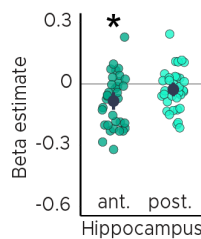

### C) Feedback-dependent hippocampal connectivity

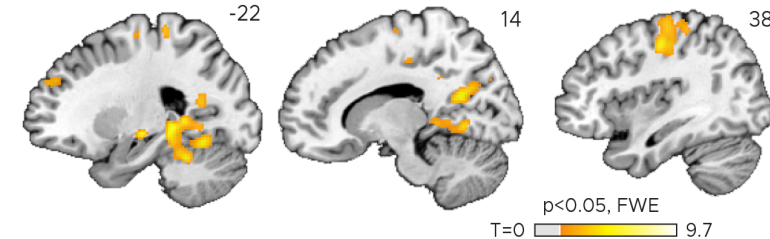

**Figure 2: Feedback on the previous trial (n-1) modulates network-wide activity and hippocampal connectivity in subsequent trials (n).** A) Voxel-wise analysis. Activity in each trial was modeled with a separate regressor as a function of feedback received in the previous trial. Insert zooming in on hippocampus added. B) Independent regions-of-interest analysis for the anterior (ant.) and posterior (post.) hippocampus. We plot the beta estimates obtained for the parametric modulator modeling trial-wise activity as a function of feedback in the previous trial. Negative values indicate that smaller errors, and higher-accuracy feedback, led to stronger activity. Depicted are the mean and SEM across participants (black dot and line) overlaid on single participant data (coloured dots). Activity in the anterior hippocampus is modulated by feedback received in previous trial. Statistics reflect  $p < 0.05$  at Bonferroni-corrected levels (\*) obtained using a group-level two-tailed one-sample t-test against zero. C) Feedback-dependent hippocampal connectivity. We plot results of a psychophysiological interactions (PPI) analysis conducted using the hippocampal peak effects in (A) as a seed. AC) We plot thresholded t-test results at 1mm resolution overlaid on a structural template brain. MNI coordinates added. Hippocampal activity and connectivity is modulated by feedback received in the previous trial.

We found that hippocampal activity co-fluctuated with activity in the primary motor cortex, the parahippocampal gyrus and medial parietal lobe as well as the cerebellum (Fig. 2C). These co-fluctuations were stronger when participants performed poorly in the previous trial and therefore when they received low-accuracy feedback. Combined with the previous analysis, this means that the absolute hippocampal activity scaled positively (Fig. 2A, B) and functional connectivity scaled negatively (Fig. 2C) with feedback valence.

### Hippocampal activity explains accuracy and biases in task performance

Two critical open questions remained. First, did the observed feedback modulation actually reflect improvements in behavioral performance over trials? Second, was the information that was learned specific to the interval that was tested in a given trial, likely serving task specificity, or was independent of the tested interval, potentially serving regularization? To answer these questions in one analysis, we used a GLM modeling activity not as a function of feedback received in the previous trial (Fig. 2), but as a function of the difference in feedback between trials (Fig. 3). Specifically, we modeled with two separate parametric regressors the improvements in TTC task performance across subsequent trials (regressor 1: TTC-independent updating) as well as the improvements over subsequent trials in which the same TTC interval was tested (regressor 2: TTC-specific updating). We again accounted for nuisance variance as before, and we contrasted trials in which participants had improved versus the ones in which they had not improved or got worse (see methods

for details).

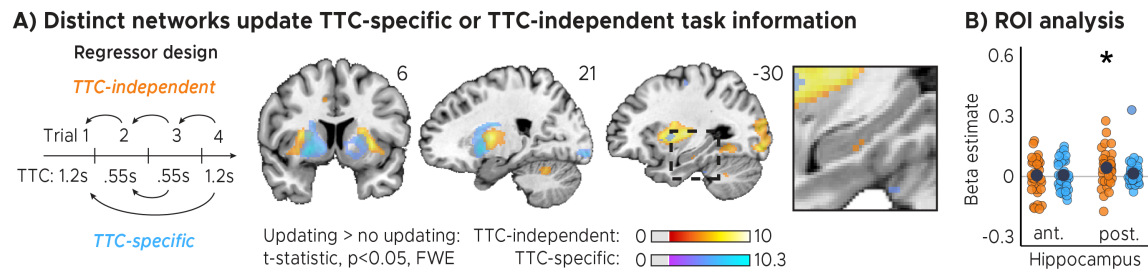

**Figure 3: Distinct cortical and subcortical networks signal the updating of TTC-specific and TTC-independent task information.**  
**A) Left panel:** Visual depiction of parametric modulator design. Two regressors per run modeled the improvement in behavioral performance since the last trial independent of the tested TTC (Regressor 1: TTC-independent) or the improvement since the last trial when the same target TTC was tested (Regressor 2: TTC-specific). **Right panel:** Voxel-wise analysis results for TTC-specific and TTC-independent regressors. We plot thresholded t-test results at 1mm resolution at  $p < 0.05$  whole-brain Family-wise-error (FWE) corrected levels overlaid on a structural template brain. Insert zooming in on hippocampus and MNI coordinates added. **B) Independent regions-of-interest analysis for the anterior (ant.) and posterior (post.) hippocampus.** We plot the beta estimates obtained for TTC-independent in orange and TTC-specific regressors in blue. Depicted are the mean and SEM across participants (black dot and line) overlaid on single participant data as dots. Statistics reflect  $p < 0.05$  at Bonferroni-corrected levels (\*) obtained using a group-level one-tailed one-sample t-test against zero.

We found both TTC-specific and TTC-independent activity throughout cortical and subcortical regions. Distinct areas engaged in either one or in both of these processes (Figs. 3A, S4). Crucially, we found that hippocampal activity signaled behavioral improvements independent of the TTC intervals tested. This effect was localized to the posterior section of the hippocampus (Fig. 3B, S2A; one-tailed one-sample  $t$  tests; TTC-independent: anterior HPC,  $t(33) = 0.36$ ,  $p = 0.360$ ,  $p_{fwe} = 1$ ,  $d = 0.06$ ,  $CI : [-0.28, 0.40]$ , posterior HPC,  $t(33) = 2.81$ ,  $p = 0.004$ ,  $p_{fwe} = 0.017$ ,  $d = 0.48$ ,  $CI : [0.12, 0.85]$ ; TTC-specific: anterior HPC,  $t(33) = 0.57$ ,  $p = 0.285$ ,  $p_{fwe} = 1$ ,  $d = 0.10$ ,  $CI : [-0.24, 0.44]$ , posterior HPC,  $t(33) = 1.29$ ,  $p = 0.103$ ,  $p_{fwe} = 0.413$ ,  $d = 0.22$ ,  $CI : [-0.12, 0.57]$ ). We then again estimated the functional connectivity profile of the hippocampal main effect using a PPI analysis (sphere with 4mm radius centered on the peak voxel at  $x = -30$ ,  $y = -24$ ,  $z = -18$ ), revealing co-fluctuations in multiple regions including the putamen and the thalamus that were specific to behavioral improvements (Fig. S5).

These results suggest that the hippocampus updates information that is independent of the target TTC. This may support generalization performance by means of regularizing the encoded intervals based on the temporal context in which they were encoded. In our task, an efficient way of regularizing the encoded information is to bias one's TTC estimates towards the mean of the TTC distribution, which corresponds to the regression effect that we observed on a behavioral level (Figs. 1B, S1C). Given the hippocampal feedback modulation and updating activity we reported above, we hypothesized that hippocampal activity should therefore also reflect the magnitude of the regression effect in behavior. To test this in a final analysis, we modeled the activity in each trial parametrically either as a function of performance (i.e. the absolute difference between estimated and true TTC) or as a function of the strength of the regression effect in each trial (i.e. the absolute difference between the estimated TTC and the mean of the tested intervals). Voxel-wise weights for these two regressors were estimated in two independent GLMs (see methods for details).

Our analyses showed that trial-wise hippocampal activity increased with better TTC-task performance (Figs. 4A, B; two-tailed one-sample  $t$  tests; anterior HPC,  $t(33) = -4.85$ ,  $p = 2.9 \times 10^{-5}$ ,  $p_{fwe} = 5.8 \times 10^{-5}$ ,  $d = -0.83$ ,  $CI : [-1.24, -0.44]$ ; posterior HPC,  $t(33) = -2.88$ ,  $p = 0.007$ ,  $p_{fwe} = 0.014$ ,  $d = -0.49$ ,  $CI : [-0.86, -0.14]$ ), and consistently also with the valence of the feedback received in the current trial (Fig. S3). In addition, however, and as predicted, it also reflected the trial-wise mag-

nititude of the behavioral regression effect (Figs. 4A, B; two-tailed one-sample  $t$  tests; anterior HPC,  $t(33) = -5.55, p = 3.6 \times 10^{-6}, p_{fwe} = 1.1 \times 10^{-5}, d = -0.95, CI : [-1.37, -0.55]$ ; posterior HPC,  $t(33) = -1.06, p = 0.295, p_{fwe} = 0.886, d = -0.18, CI : [-0.53, 0.16]$ ). Activity in the anterior hippocampus was stronger in trials in which participants' TTC estimates were more biased towards the mean of the sampled intervals (indicated by a negative beta estimate). Notably, similar effects were observed in prefrontal and posterior cingulate areas (Fig. 4A).

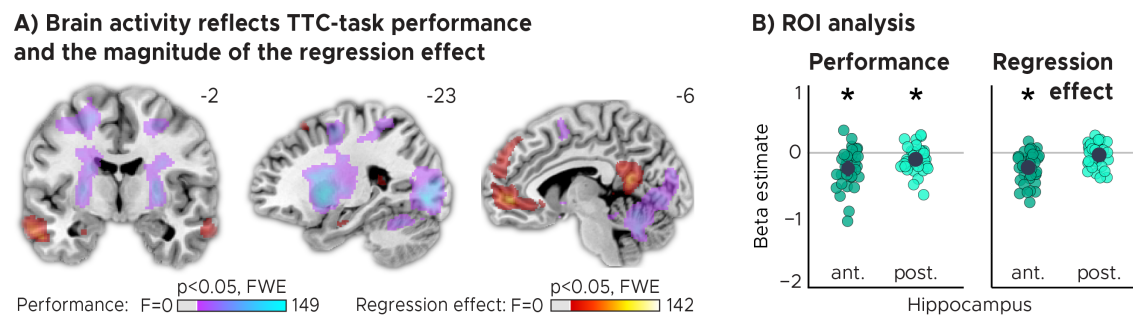

**Figure 4: TTC-task performance vs. behavioral regression effect.** A) Voxel-wise analysis. We plot thresholded F-test results for the task-performance regressor and the regression-to-the-mean regressor at 1 mm resolution overlaid on a structural template brain. MNI coordinates added. Distinct networks reflect task performance and the magnitude of the regression effect. B) Independent regions-of-interest analysis for the anterior (ant.) and posterior (post.) hippocampus. We plot the beta estimates obtained for each participant for each of the two regressors. Negative values indicate a linear increase between hippocampal activity and either task performance (left, Performance) or the magnitude of the regression effect (right, Regression effect). Depicted are the mean and SEM across participants (black dot and line) overlaid on single participant data (colored dots). Statistics reflect  $p < 0.05$  at Bonferroni-corrected levels (\*) obtained using a group-level two-tailed one-sample  $t$ -test against zero.

## Eye tracking: no relevant biases in viewing behavior

To ensure that our results could not be attributed to systematic error patterns in viewing behavior, we analyzed the co-recorded eye tracking data of our participants in detail. After data cleaning (see methods), we used Kruskal-Wallis tests to control for differences in fixation accuracy across speed levels (Fig. S6A;  $\chi^2(2) = 0.61, p = 0.895, \epsilon^2 = 0.005, CI : [0.00, 0.06]$ ) and received-feedback levels (Fig. S6B;  $\chi^2(2) = 0.190, p = 0.909, \epsilon^2 = 0.002, CI : [0.00, 0.10]$ ). Moreover, we examined the relationship of the fixation error with TTC-task performance (Fig. S6C; Spearman's  $\rho = 0.17, p = 0.344$ ) as well as with the behavioral regression effect (Fig. S6C; Spearman's  $\rho = 0.26, p = 0.131$ ). None of these control analyses suggested that biased patterns in viewing behavior could hinder the interpretation of our results.

## Discussion

This study investigated how the brain extracts the statistical regularities of a sensorimotor timing task in a feedback-dependent manner. We specifically focused on the hippocampus, due to its known role in temporal coding and learning, asking how hippocampal processing may support behavioral flexibility, specificity and regularization. Moreover, we explored the larger brain-wide network involved in balancing these objectives. To do so, we monitored human brain activity with fMRI while participants estimated the time-to-contact between a moving target and a visual boundary. This allowed us to analyze brain activity as a function of task performance and as a function of the improvements in performance over time. We found that hippocampal activity as well as functional connectivity reflected the feedback participants received during this task, and its activ-

ity followed the performance improvements in a temporal-context-dependent manner. It signaled sensorimotor updating independent of the specific intervals tested, and its activity reflected trial-wise behavioral biases towards the mean of the sampled intervals. In what follows, we discuss our results in the context of prior work on timing behavior and on hippocampal spatiotemporal coding. Moreover, we elaborate on the domain-general nature of hippocampal-cortical interactions and on the sensorimotor updating mechanisms that potentially underlie the effects observed in this study.

## Spatiotemporal coding in the hippocampus

The hippocampus encompasses neurons sensitive to elapsed time (Paton & Buonomano, 2018; Eichenbaum, 2014; Umbach et al., 2020). These cells might play an important role in guiding timing behavior (Nobre & van Ede, 2018), which potentially explains why hippocampal damage or inactivation impairs the ability to estimate durations in rodents (Meck et al., 1984) and humans (Richards, 1973). Our results are in line with these reports, showing that hippocampal fMRI activity also reflects participants' TTC estimation ability (Fig. 4). They are also in line with other human neuroimaging studies suggesting that the hippocampus bridges temporal gaps between two stimuli during trace eyeblink conditioning (Cheng et al., 2008), and that it represents duration within event sequences (Barnett et al., 2014; Thavabalasingam et al., 2018, 2019). Our results speak to the above-mentioned reports by revealing that the hippocampus is an integral part of a widespread brain network contributing to sensorimotor updating of encoded intervals in humans (Figs. 2,3,4,S3,S4,S5). Moreover, they demonstrate a direct link between hippocampal activity, the feedback participants received and the behavioral improvements expressed over time (Fig. 3), emphasizing its role in feedback learning. Critically, the underlying process must occur in real-time when feedback is presented, suggesting that it plays out on short time scales. Notably, the human hippocampus is neither typically linked to sensorimotor timing tasks such as ours, nor is its activity considered to reflect temporal relationships on such short time scales. Instead, human hippocampal processing is often studied in the context of much longer time scales (Schiller et al., 2015; Eichenbaum, 2017), which showed that it may support the encoding of the progression of events into long-term episodic memories (Deuker et al., 2016; Montchal et al., 2019; Bellmund et al., 2021) or contribute to the establishment of chronological relations between events in memory (Gauthier et al., 2019, 2020). Intriguingly, the mechanisms at play may build on similar temporal coding principles as those discussed for motor timing (Yin & Troger, 2011; Eichenbaum, 2014; Howard, 2017; Palombo & Verfaellie, 2017; Nobre & van Ede, 2018; Paton & Buonomano, 2018; Bellmund et al., 2020, 2021; Shikano et al., 2021; Shimbo et al., 2021).

Our task can be solved by estimating temporal intervals directly, but also by extrapolating the movement of the fixation target over time, shifting the locus of attention towards the target boundary (Fig. 1). The brain may therefore likely monitor the temporal and spatial task regularities in parallel. Participants' TTC estimates were further informed exclusively by the speed of the target, which inherently builds on tracking kinematic information over time, which may explain why TTC tasks also engage visual motion regions in humans (de Azevedo Neto & Amaro Júnior, 2018). While future studies could tease apart spatial and temporal factors explicitly, our results are in line with both accounts. For example, the hippocampus and surrounding structures represent maps of visual space in primates, which potentially mediate a coordinate system for planning behavior, integrating visual information with existing knowledge and to compute vectors in space (Nau et al., 2018; Bicanski & Burgess, 2020). These visuospatial representations are perfectly suited to guide attention and therefore the relevant behaviors in our task (Aly & Turk-Browne, 2017), which could be

273 tested in the future akin to prior work using a similar paradigm (Nau et al., 2018a).

## 274 **The role of feedback in timed motor actions**

275 Importantly, our results neither imply that the hippocampus acts as an "internal clock", nor do we  
276 think of it as representing action sequences or coordinating motor commands directly. Rather,  
277 its activity may indicate the feedback-dependent updating of encoded information more generally  
278 and independent of the task that was used. The hippocampal formation has been proposed as a  
279 domain-general learning system (Kumaran, 2012; Schlichting & Preston, 2015; Chersi & Burgess,  
280 2015; Schapiro et al., 2017; Wikenheiser et al., 2017; Behrens et al., 2018; Vikbladh et al., 2019;  
281 Geerts et al., 2020; Momennejad, 2020), which may encode the structure of a task abstracted away  
282 from our immediate experience. In contrast, the striatum was proposed to encode sensory states  
283 or actions, supporting the learning of task-specific (egocentric) information (Chersi & Burgess, 2015;  
284 Geerts et al., 2020). Together, the two regions may therefore play an important role in decision  
285 making in general also in other non-temporal domains.

286 Consistent with these ideas, we observed that striatal and hippocampal activity was modulated  
287 by behavioral feedback received in each trial (Figs. 2, S3). Similar feedback signals have been pre-  
288 viously linked to learning (Schönberg et al., 2007; Cohen & Ranganath, 2007; Shohamy & Wagner,  
289 2008; Foerde & Shohamy, 2011; Wimmer et al., 2012) and the successful formation of hippocampal-  
290 dependent long-term memories in humans (Wittmann et al., 2005). Moreover, hippocampal activity  
291 is known to signal learning in other tasks (Doeller et al., 2008; Foerde & Shohamy, 2011; Dickerson  
292 & Delgado, 2015; Wirth et al., 2009; Schapiro et al., 2017; Kragel et al., 2021). Here, we show a direct  
293 relationship between hippocampal activity and ongoing timing behavior, and we show that receiv-  
294 ing behavioral feedback modulates widespread brain activity (Figs. 2, S3), which potentially reflects  
295 the involvement of these areas in the coordination of reward behavior observed earlier (LeGates  
296 et al., 2018). These regions include those serving sensorimotor functions, but also those encoding  
297 the structure of a task or the necessary value functions associated with specific actions (Lee et al.,  
298 2012).

299 The present study further demonstrates that activity in the hippocampus co-fluctuates with activity  
300 in other likely task-relevant regions in a task-dependent manner. We observed such co-fluctuations  
301 in the striatum and cerebellum, often associated with reward processing and action coordination  
302 (Bostan & Strick, 2018; Cox & Witten, 2019), the motor cortex, typically involved in action planning  
303 and execution, as well as the parahippocampal gyrus and medial parietal lobe, often associated  
304 with visual-scene analysis (Epstein & Baker, 2019). This may indicate that behavioral feedback also  
305 affects the functional connectivity profile of the hippocampus with those domain-selective regions  
306 that are currently engaged in the ongoing task. In the present report, this included the motor  
307 cortex, the parahippocampal gyrus, the medial parietal lobe and the cerebellum. This may also  
308 relate to previous reports of the cerebellum contributing temporal signals to cortical regions during  
309 similar tasks as ours (O'Reilly et al., 2008). Interestingly, we observed that hippocampal functional  
310 connectivity scaled negatively (Fig. 2C) with feedback valence, unlike its absolute activity, which  
311 scaled positively with feedback valence (Fig. 2A,B).

312 What might be the neural mechanism underlying sensorimotor updating signals in our task? Prior  
313 work has shown that hippocampal, frontal and striatal temporal receptive fields scale relative to  
314 the tested intervals, and that they re-scale dynamically when those tested intervals change (Mac-  
315 Donald et al., 2011; Gouvêa et al., 2015; Mello et al., 2015; Wang et al., 2018). This may enable  
316 the encoding and continuous maintenance of optimal task priors, which keep our actions well-

adjusted to our current needs. We speculate that such receptive-field re-scaling also underlies the continuous updating effects discussed here, which likely build on both local and network-wide re-weighting of functional connections between neurons and entire regions. Consistent with this idea and the present results, receptive-field re-scaling can occur on a trial-by-trial basis in the hippocampus (Shikano et al., 2021; Shimbo et al., 2021) but also in other regions such as the striatum (Mello et al., 2015; Gouvêa et al., 2015; Wang et al., 2018).

### **A trade-off between specificity and regularization?**

So far, we discussed how the brain may capture the temporal structure of a task and how the hippocampus supports this process. However, how do we encode specific task details while still forming representations that generalize well to new scenarios? In other words, how does the brain encode the probability distribution of the intervals we tested optimally without overfitting? Our behavioral and neuroimaging results suggest that this trade-off between specificity and regularization is governed by many regions, updating different types of task information in parallel (Fig. 3A). For example, hippocampal activity reflected performance improvements independent of the tested interval, whereas the caudate signaled improvements specifically over those trials in which the same TTC was tested. In the putamen, we found evidence for both processes (Fig. S4B). This suggests that different regions encode distinct task regularities in parallel to form optimal sensorimotor representations to balance specificity and regularization.

Notably, our results make a central prediction for future research. We anticipate that participants with stronger updating activity in the hippocampus should be able to generalize better to new scenarios, for example when new intervals are tested. While we could not test this prediction directly in our study, we did test for a link to a related phenomenon, and that is the regression effect we observed on the behavioral level. We found that TTC estimates regressed towards the mean of the sampled intervals in all participants (Figs. 1B, S1C), an effect that is well known in the timing literature (Jazayeri & Shadlen, 2010) and other domains (Petzschner & Glasauer, 2011; Petzschner et al., 2015). This regression effect likely reflects regularization in support of generalization (Roach et al., 2017), because time estimates are biased towards the mean of the tested intervals, and because the mean will likely be close to the mean of possible future intervals. We therefore hypothesized that this effect is grounded in the activity of the hippocampus, because it plays a central role in generalization in other non-temporal domains (Kumaran, 2012; Schlichting & Preston, 2015; Schapiro et al., 2017; Momennejad, 2020). Our analyses revealed that this was indeed the case. We found that hippocampal activity followed the magnitude of the regression effect in each trial (Fig. 4), potentially reflecting the temporal-context-dependent regularization of encoded intervals toward the grand mean of the tested intervals (Jazayeri & Shadlen, 2010).

In addition, our voxel-wise results showed that striatal subregions only tracked how accurate participants' responses were, not how strongly they regressed towards the mean (Fig. 4A). This dovetails with literature on spatial-navigation (Doeller et al., 2008; Chersi & Burgess, 2015; Goodroe et al., 2018; Gahnstrom & Spiers, 2020; Geerts et al., 2020; Wiener et al., 2016), showing that the striatum supports the reinforcement-dependent encoding of locations relative to landmarks, whereas the hippocampus may help to encode the structure of the environment in a generalizable and map-like format. This matches the functional differences observed here in the time domain, where caudate activity reflects the encoding of individual details of our task such as the TTC intervals (Figs. 3A, S4A, B), while the hippocampus generalizes across TTCs to encode the overall task structure (Figs. 3A, B, S4A).

## 361 **Conclusion**

362 In sum, we combined fMRI with time-to-contact estimations to show that the hippocampus sup-  
 363 ports the formation of task-specific yet flexible and generalizable sensorimotor representations  
 364 in real time. Hippocampal activity reflected trial-wise behavioral feedback and the behavioral im-  
 365 provements across trials, suggesting that it supports sensorimotor updating even on short time  
 366 scales. The observed updating signals were independent from the tested intervals, and they ex-  
 367 plained the regression-to-the-mean biases observed on a behavioral level. This suggests that the  
 368 hippocampus may encode temporal context in a behavior-dependent manner, and that it supports  
 369 finding an optimal trade off between specificity and regularization. We show that it does so even  
 370 in a fast-paced timing task typically considered to be hippocampal-independent. Our results show  
 371 that the hippocampus supports rapid and feedback-dependent updating of sensorimotor repre-  
 372 sentations, making it a central component of a brain-wide network balancing task specificity vs.  
 373 regularization for flexible behavior in humans.

## 374 **Acknowledgements**

375 We thank Raymundo Machado de Azevedo Neto for helpful comments on an earlier version of this  
 376 manuscript. This work is funded by the European Research Council (ERC-CoG GEOCOG 724836  
 377 awarded to CFD). CFD's research is further supported by the Max Planck Society, the Kavli Founda-  
 378 tion, the Jebsen foundation, the Centre of Excellence scheme of the Research Council of Norway –  
 379 Centre for Neural Computation (223262/F50), The Egil and Pauline Braathen and Fred Kavli Centre  
 380 for Cortical Microcircuits and the National Infrastructure scheme of the Research Council of Norway  
 381 – NORBRAIN (197467/F50). RK's research is supported by a CIDEAGENT grant (CIDEAGENT/2021/027)  
 382 from the Valencian Community's program for the support of talented researchers.

## 383 **Author Contributions**

384 MN, IP and CFD developed the research questions. MN conceived the experimental idea. IP and MN  
 385 designed the experimental paradigm, visualized the results and embedded them in the literature  
 386 with help from RK, VW and CFD. IP implemented the experimental code and acquired and analyzed  
 387 the data with close supervision and help from MN. MN wrote the manuscript with help from IP. CFD  
 388 secured funding. RK, VW and CFD provided critical feedback and all authors discussed the results  
 389 and edited the final manuscript. IP and MN are shared-first authors.

## 390 **Declaration of interest**

391 The authors declare no conflicts of interest.

## 392 **Data and code availability**

393 Source data and analysis code will be shared upon publication. Raw data are available from the  
 394 authors upon request.

## 395 **Methods**

### 396 **Participants**

397 We recruited 39 participants for this study (16 females, 19-35 years old). Five participants were  
 398 excluded: one participant did not comply with the task instructions; one was excluded due to a fail-  
 399 ure of the eye-tracker calibration; three participants were excluded due to technical issues during  
 400 scanning. A total of 34 participants entered the analysis. The study was approved by the regional  
 401 committee for medical and health research ethics (project number 2017/969) in Norway and partic-  
 402 ipants gave written consent prior to scanning in accordance with the declaration of Helsinki ([World](#)  
 403 [Medical Association, 2013](#)).

### 404 **Task**

405 Participants performed two tasks simultaneously: a smooth pursuit visual-tracking task and a time-  
 406 to-contact estimation task. The visual tracking task entailed fixation at a fixation disc that moved on  
 407 predefined linear trajectories with one of four speeds: 4.2°/s, 5.8°/s, 7.5°/s and 9.1°/s. Upon reach-  
 408 ing the end of such a linear trajectory, the dot stopped moving until the second task was completed.  
 409 This second task was a time-to-collision (TTC) estimation task in which participants indicated when  
 410 the fixation target would have hit a circular boundary if it had continued moving. This boundary  
 411 was a yellow circular line surrounding the target trajectory with 10° radius. Participants gave their  
 412 response by pressing a button at the anticipated moment of collision. They performed this task  
 413 while still keeping fixation, and the individual linear trajectories were all of the same length (10°  
 414 visual angle), leading to four target TTC durations of 1.2s, 0.88s, 0.67s and 0.55s tested in a counter-  
 415 balanced fashion across trials. After the button press, participants received feedback for 1 second  
 416 informing them about the accuracy of their response. When participants *overestimated* the TTC,  
 417 half of the fixation disc closest to the boundary changed color (orange or red) as a function of re-  
 418 sponse accuracy (medium or low, respectively). When participants *underestimated* the TTC, half of  
 419 the fixation disc further away from the boundary changed color. When participants were accurate,  
 420 two opposing quadrants of the fixation disc would turn green. This allowed us to present feedback  
 421 at fixation while keeping the number of informative pixels matched across feedback levels. To cal-  
 422 ibrate performance feedback across different TTC durations, the precise response window widths  
 423 of each feedback level scaled with the speed of the fixation target. The following formula was used  
 424 to scale the response window width:  $d \pm ((k * d)/2)$  where  $d$  is the target TTC and  $k$  is a constant  
 425 proportional to 0.3 and 0.15 for high and medium accuracy, respectively. This ensured that partici-  
 426 pants received approximately the same feedback for tested TTCs despite the known differences in  
 427 absolute performance between target TTCs due to inherent scalar variability ([Gibbon, 1977](#)). When  
 428 no response was given, participants received low-accuracy feedback (two opposing quadrants of  
 429 the fixation dot turned red) after a 4 seconds timeout. After the feedback, the disc remained in its  
 430 last position for a variable inter-trial interval (ITI) sampled randomly from a uniform distribution  
 431 between 0.5 seconds and 1.5 seconds. Following the end of the ITI, the dot continued moving in a  
 432 different direction. In the course of 768 trials, each target TTC was sampled 192 times. We sampled  
 433 eye-movement directions with 15° resolution, leading to an overall trajectory that was star-shaped,  
 434 similar to earlier reports ([Nau et al., 2018a](#)). The full trajectory was never explicitly shown to the  
 435 participants.

## Behavioral analysis

Participants indicated the estimated TTC in each trial via button press. In line with previous work (Jazayeri & Shadlen, 2010), participants tended to overestimate shorter durations and underestimate longer durations (Fig. 1B). In order to quantify this behavioral effect we extracted the slope value of a linear regression line fit between estimated and target TTCs separately for each participant. A slope of 1 would indicate that participants performed perfectly accurately for all intervals. A slope of 0 would indicate that participants always gave the same response independent of the tested interval, fully regressing to the mean of the sampled intervals. Two separate one-tailed one-sample *t* tests (against 1 or 0) were performed to corroborate that participants' slope values regressed towards the mean of the sampled TTCs (Fig. S1C). A Spearman's rank-order correlation tested if slope values correlated with the percent of high accuracy trials (Fig. S1D), to further demonstrate that participants relied to different degrees on both, the target TTCs and the mean of the sampled TTCs, in order to achieve an optimal performance tradeoff. As the TTC task progressed, it would be expected that participants adjusted their TTC estimates in order to find the best trade-off. Thus, we tested if the slope converged over time towards the value of 0.5 (the slope value between veridical performance and the mean of the sampled TTCs) by using a linear mixed-effects model with task segment as a predictor, the absolute difference between the slope and the value of 0.5 as the dependent variable and participants as the error term (Fig. S1E). As a measure of behavioral performance, we computed the absolute TTC-error defined as the absolute difference in estimated and true TTC for each target-TTC level. Participants received feedback after each trial corresponding to the absolute TTC error of that trial. On average, 46.9% ( $\sigma = 9.1$ ) of trials were of *high accuracy*, 31.2% ( $\sigma = 3.9$ ) were of *medium accuracy* and 21.1% ( $\sigma = 9.8$ ) were of *low accuracy* (Fig. 1C). Moreover, we found that this feedback distribution was indeed similar across target-TTC levels as planned (Fig. S1B). To control that there was no systematic and predictable relationship between subsequent trials on a behavioral level, we estimated the n-1 Pearson autocorrelation between feedback values received on each trial and then performed a two-tailed one-sample *t*-test on group level against zero using the extracted correlation coefficients from each participant (Fig. S1A). To further test participants' performance improvements over time, we used a linear mixed-effects model with task segment as predictor, absolute TTC-error as the dependent variable and participants as the error term (Fig. S1F).

## Imaging data acquisition & preprocessing

Imaging data were acquired on a Siemens 3T MAGNETOM Skyra located at the St. Olavs Hospital in Trondheim, Norway. A T1-weighted structural scan was acquired with 1mm isotropic voxel size. Following EPI-parameters were used: voxel size=2mm isotropic, TR=1020ms, TE=34.6ms, flip angle=55°, multiband factor=6. Participants performed a total of four scanning runs of 16-18 minutes each including a short break in the middle of each run. Functional images were corrected for head motion and co-registered to each individual's structural scan using SPM12 ([www.fil.ion.ucl.ac.uk/spm/](http://www.fil.ion.ucl.ac.uk/spm/)). We used the FSL topup function to correct field distortions based on one image acquired with inverted phase-encoding direction (<https://fsl.fmrib.ox.ac.uk/fsl/fslwiki/topup>). Functional images were then spatially normalized to the Montreal Neurological Institute (MNI) brain template and smoothed with a Gaussian kernel with full-width-at-half-maximum of 4 mm for regions-of-interest analysis or with 8 mm for whole-brain analysis. Time series were high-pass filtered with a 128 s cut-off period. The results of all voxel-wise analyses were overlaid on a structural T1-template (colin27) of SPM12 for visualization.

## 480 Regions of interest definition and analysis

481 Regions-of-interest masks for different brain areas were generated for each individual participant  
482 based on the automatic parcellation derived from FreeSurfer's structural reconstruction ([https://  
483 surfer.nmr.mgh.harvard.edu/](https://surfer.nmr.mgh.harvard.edu/)). The ROIs used in the present study include the Hippocampus  
484 as main area of interest (Fig. S2A) as well as the Caudate Nucleus, Nucleus Accumbens, Thalamus,  
485 Putamen, Amygdala and Globus Pallidum (Fig. S2B). The hippocampal ROI was manually segmented  
486 following previous reports into its anterior and posterior sections based on the location  
487 of the uncus apex in the coronal plane as a bisection point (Poppenk et al., 2013). We did this because  
488 prior work suggested functional differences between anterior and posterior hippocampus  
489 with respect to their contributions to memory-guided behavior (Poppenk et al., 2013). All individual  
490 ROIs were then spatially normalized to the MNI brain template space and re-sliced to the functional  
491 imaging resolution using SPM12. All ROI analyses were conducted using 4mm spatial smoothing.

492 All ROI analyses described in the following were conducted using the following procedure. We  
493 extracted beta estimates estimated for the respective regressors of interest for all voxels within  
494 a region in both hemispheres, averaged them across voxels within that region and hemispheres  
495 and performed one-sample t-tests on group level against zero as implemented in the software R  
496 (<https://www.R-project.org>).

## 497 Brain activity as a function of performance feedback on the previous trial

498 To examine how feedback modulates activity in the subsequent trial, we used a mass-univariate  
499 general linear model (GLM) analysis to model the activity of each voxel and trial as a function of  
500 feedback received in the previous trial. The GLM included three regressors modeling the feedback  
501 levels, one for ITIs, one for button presses and one for periods of rest, which were all convolved  
502 with the canonical hemodynamic response function of SPM12. In addition, the model included the  
503 six realignment parameters obtained during pre-processing as well as a constant term modeling  
504 the mean of the time series. On the group level, we then contrasted the weights obtained for the  
505 low error vs. high error regressors and tested for differences using t-tests implemented in SPM12  
506 (Fig. 2A).

507 Additionally, we again conducted ROI analyses for the anterior and posterior sections of the hippocampus  
508 (Fig. S2A) following the same procedure as described earlier (section "Regions of interest  
509 definition and analysis"). Here, we tested beta estimates obtained in the first-level analysis for the  
510 feedback-in-previous-trial regressor of interest (Fig. 2B).

## 511 Hippocampal functional connectivity as a function of previous-trial performance feedback

512 We conducted a psychophysiological interactions (PPI) analysis to examine whether hippocampal  
513 functional connectivity with the rest of the brain depended on the participant's performance on  
514 the previous trial. To do so, we centered a sphere onto the group-level peak effects within the  
515 HPC using main-effect GLM described in the previous section. The sphere was 4mm in radius  
516 and was centered on the following MNI coordinates: x=-32, y=-14, z=-14. The GLM included a PPI  
517 regressor, a nuisance regressor accounting for the main effect of past-trial performance, and a  
518 nuisance regressor explaining variance due to inherent physiological signal correlations between  
519 the HPC and the rest of the brain. The PPI regressor was an interaction term containing the element-  
520 by-element product of the task time course (effects due to past-trial performance) and the HPC  
521 spherical seed ROI time course. The estimated beta weight corresponding to the interaction term  
522 was then tested against zero on the group-level using a t-test implemented in SPM12 (Fig. 2C). This

revealed brain areas whose activity was co-varying with the hippocampus seed ROI as a function of past-trial performance (n-1).

### Brain activity as a function of current-trial performance feedback

We used a GLM to analyze the time courses of all voxels in the brain as a function of feedback received at the end of each trial. The model included one mean-centered parametric modulator per run with three levels reflecting the feedback received in each trial. The feedback itself was a function of TTC error in each trial (high accuracy = 0, medium accuracy = 0.5 and low accuracy = 1). In addition, we added three nuisance regressors per run modeling ITIs, button presses, and periods of rest. These regressors were convolved with the canonical hemodynamic response function of SPM12. Moreover, the realignment parameters and a constant term were again added. We estimated weights for all regressors and conducted a t-test against zero using SPM12 for our feedback regressors of interest on the group level (Fig. S3A). Importantly, positive t-scores indicate a positive relationship between fMRI activity and TTC error and hence with poor behavioral performance. Conversely, negative t-scores indicate a negative relation between the two variables and hence better behavioral performance.

In addition to the voxel-wise whole-brain analyses described above, we conducted independent ROI analyses for the anterior and posterior sections of the hippocampus (Fig. S2A). Here, we tested the beta estimates obtained in our first-level analysis for the feedback regressor of interest (Fig. S3B). See section "Regions of interest definition and analysis" for more details.

### Brain activity as a function of improvements in behavioral performance across trials

We used a GLM to analyze activity changes associated with behavioral improvements across trials. One regressor modelled the main effect of the trial and two parametric regressors modeled the following contrasts: trials in which behavioral performance improved vs. trials in which behavioral performance did not improve or got worse relative to the previous trial. These regressors modeled the behavioral improvements either relative to the previous trial, and therefore independently of TTC (likely serving regularization), or relative to the previous trial in which the same target TTC was presented (likely serving specificity). These two regressors reflect the tests for target-TTC-independent and target-TTC-specific updating, respectively. Improvement in performance was defined as receiving feedback of higher valence than in the corresponding previous trial. The same nuisance regressors were added as in the other GLMs and all regressors except the realignment parameters and the constant term were convolved with the canonical hemodynamic response function of SPM12. On the group level, we tested the two parametric regressors of interest against zero using a t-test implemented in SPM12, effectively contrasting trials in which behavioral performance improved against trials in which behavioral performance did not improve or got worse relative to the respective previous trials (Fig. 3A). All runs were modeled separately.

Moreover, we again conducted ROI analyses for the anterior and posterior sections of the hippocampus (Fig. S2A) following the same procedure as described earlier (see section "Regions of interest definition and analysis"). Here, we tested beta estimates obtained in the first-level analysis for the TTC-specific and TTC-independent updating regressors using one-tailed one-sample t-tests (Fig. 3B). In addition, to test which specific subcortical regions were involved in these processes, we conducted post-hoc ROI analyses for subcortical regions after the whole-brain results were known (Fig. S4B; one-tailed one-sample  $t$  tests; TTC-specific: caudate:  $t(33) = 5.95, p = 5.6 \times 10^{-7}, p_{fwe} = 3.4 \times 10^{-6}, d = 1.02, CI : [0.61, 1.45]$ , nucleus accumbens:  $t(33) = 4.41, p = 5.2 \times 10^{-5}, p_{fwe} = 3.1 \times 10^{-4}, d =$

0.76,  $CI : [0.38, 1.15]$ , globus pallidus:  $t(33) = 7.05, 2.3 \times 10^{-8}, p_{fwe} = 1.4 \times 10^{-7}, d = 1.21, CI : [0.77, 1.67]$ , putamen:  $t(33) = 8.07, p = 1.3 \times 10^{-9}, p_{fwe} = 7.7 \times 10^{-9}, d = 1.38, CI : [0.92, 1.88]$ , amygdala:  $t(33) = 1.78, p = 0.042, p_{fwe} = 0.255, d = 0.30, CI : [-0.04, 0.66]$ , thalamus:  $t(33) = 2.61, p = 0.007, p_{fwe} = 0.007, d = 0.45, CI : [0.09, 0.81]$ ; TTC-independent: caudate:  $t(33) = -0.67, p = 0.746, p_{fwe} = 1, d = -0.11, CI : [-0.46, 0.23]$ , nucleus accumbens:  $t(33) = 1.82, p = 0.039, p_{fwe} = 0.235, d = 0.31, CI : [-0.04, 0.66]$ , globus pallidus:  $t(33) = 7.06, p = 2.2 \times 10^{-8}, p_{fwe} = 1.3 \times 10^{-7}, d = 1.21, CI : [0.77, 1.68]$ , putamen:  $t(33) = 6.21, p = 2.6 \times 10^{-7}, p_{fwe} = 1.6 \times 10^{-6}, d = 1.06, CI : [0.65, 1.50]$ , amygdala:  $t(33) = 4.25, p = 8.3 \times 10^{-5}, p_{fwe} = 4.9 \times 10^{-4}, d = 0.73, CI : [0.35, 1.12]$ , thalamus:  $t(33) = 4.05, p = 1.5 \times 10^{-4}, p_{fwe} = 8.9 \times 10^{-4}, d = 0.69, CI : [0.32, 1.08]$ ). The subcortical ROIs (Fig. S2B) were based on the FreeSurfer parcellation as described in the section "Regions of interest definition and analysis".

## Hippocampal functional connectivity as a function of TTC-independent updating

To examine which brain regions whose activity co-fluctuated with the one of the hippocampus during TTC-independent updating, we again conducted a PPI analysis similar to the one described earlier. A spherical seed ROI with a radius of 4 mm was centered around the hippocampal group-level peak effect ( $x=-30, y=-24, z=-18$ ) observed for the TTC-independent updating regressor described above. The GLM included a PPI regressor and two nuisance regressors accounting for task-related effects from our contrast of interest (Behavioral improvements vs. no behavioral improvements) as well as physiological correlations that could arise due to anatomical connections to the hippocampal seed region or shared subcortical input. On the group-level, we then tested the weights estimated for our PPI regressor of interest against zero using a t-test implemented in SPM12. This revealed areas whose activity co-fluctuated with the one of the hippocampus as a function TTC-independent updating (Fig. S5A).

Moreover, we conducted independent ROI analyses for subcortical regions as described in the section "Regions of interest definition and analysis". Here, we tested the beta estimates obtained for the hippocampal seed-based PPI regressor of interest (Fig. S5B; one-tailed one-sample  $t$  tests: caudate:  $t(33) = 1.06, p = 0.149, p_{fwe} = 0.894, d = 0.18, CI : [-0.16, 0.53]$ , putamen:  $t(33) = 2.79, p = 0.004, p_{fwe} = 0.026, d = 0.48, CI : [0.12, 0.84]$ , globus pallidus:  $t(33) = 2.52, p = 0.008, p_{fwe} = 0.050, d = 0.43, CI : [0.08, 0.79]$ , amygdala:  $t(33) = 2.60, p = 0.007, p_{fwe} = 0.041, d = 0.45, CI : [0.09, 0.81]$ , nucleus accumbens:  $t(33) = -1.14, p = 0.869, p_{fwe} = 1, d = -0.20, CI : [-0.54, 0.15]$ , thalamus:  $t(33) = 2.71, p = 0.005, p_{fwe} = 0.032, d = 0.46, CI : [0.11, 0.83]$ ).

## Brain activity as a function of behavioral performance and as a function of the behavioral regression effect

To examine the neural underpinnings governing specificity and regularization in timing behavior in detail, we analyzed the trial-wise activity of each voxel as a function of performance in the TTC task (i.e. the absolute difference between estimated and true TTC in each trial) and as a function of the regression effect in behavior (i.e. the absolute difference between the estimated TTC and the mean of the sampled intervals, which was 0.82 s). To avoid effects of potential co-linearity between these regressors, we estimated model weights using two independent GLMs, which modeled the time course of each trial with either one of the two regressors. In addition, we again accounted for nuisance variance as described before, and all regressors except the realignment parameters and the constant term were convolved with the canonical HRF of SPM12. After fitting the model, we used the weights estimated for the two regressors to perform voxel-wise F-tests using SPM12, revealing activity that was correlated with these two regressors independent of the sign of the correlation (Fig. 4A). In addition, we again performed ROI analyses using two-tailed one-sample

610 t-tests for the anterior and posterior hippocampus (Figs. S2A, 4B).

# 611 **Eye tracking: Fixation quality does not affect the interpretation of our results**

612 We used an MR-compatible infrared eye tracker with long-range optics (Eyelink 1000) to monitor  
613 gaze position at a rate of 500 hz during the experiment. After blink removal, the eye tracking data  
614 was linearly detrended, median centered, downsampled to the screen refresh rate of 120 hz and  
615 smoothed with a running-average kernel of 100 ms. Kruskal-Wallis tests were used in order to test  
616 for potential biases in fixation error across speeds (Fig. S6A) or across feedback levels (Fig. S6B).  
617 Moreover, we tested if differences in fixation error could either explain individual differences in  
618 the regression effect, or individual differences in absolute TTC error in behavior using Spearman's  
619 rank-order correlations (Fig. S6C).

## References

- 621 Acerbi, L., Wolpert, D. M., & Vijayakumar, S. (2012). Internal Representations of Temporal Statistics and Feedback Calibrate Motor-  
622 Sensory Interval Timing. *PLoS Computational Biology*, 8(11), e1002771. doi: 10.1371/journal.pcbi.1002771
- 623 Aly, M., & Turk-Browne, N. B. (2017). How hippocampal memory shapes, and is shaped by, attention. In D. E. Hannula & M. C. Duff  
624 (Eds.), *The hippocampus from cells to systems: Structure, connectivity, and functional contributions to memory and flexible cognition* (pp.  
625 369–403). Cham: Springer International Publishing. doi: 10.1007/978-3-319-50406-3\_12
- 626 Barnett, A. J., O'Neil, E. B., Watson, H. C., & Lee, A. C. (2014). The human hippocampus is sensitive to the durations of events and  
627 intervals within a sequence. *Neuropsychologia*, 64, 1–12. doi: 10.1016/j.neuropsychologia.2014.09.011
- 628 Behrens, T. E., Muller, T. H., Whittington, J. C., Mark, S., Baram, A. B., Stachenfeld, K. L., & Kurth-Nelson, Z. (2018). What Is a Cognitive  
629 Map? Organizing Knowledge for Flexible Behavior. *Neuron*, 100(2), 490–509. doi: 10.1016/j.neuron.2018.10.002
- 630 Bellmund, J., Deuker, L., Montijn, N. D., & Doeller, C. F. (2021). *Structuring time: The hippocampus constructs sequence memories that*  
631 *generalize temporal relations across experiences* (preprint). bioRxiv. doi: 10.1101/2021.04.23.440002
- 632 Bellmund, J., Polti, I., & Doeller, C. F. (2020). Sequence memory in the hippocampal–entorhinal region. *Journal of Cognitive Neuroscience*,  
633 32(11), 2056–2070. doi: 10.1162/jocn\_a\_01592
- 634 Bicanski, A., & Burgess, N. (2020, September). Neuronal vector coding in spatial cognition. *Nature Reviews Neuroscience*, 21(9), 453–470.  
635 Retrieved 2021-10-22, from <https://www.nature.com/articles/s41583-020-0336-9> doi: 10.1038/s41583-020-0336-9
- 636 Bostan, A. C., & Strick, P. L. (2018). The basal ganglia and the cerebellum: Nodes in an integrated network. *Nature Reviews Neuroscience*,  
637 19(6), 338–350. doi: 10.1038/s41583-018-0002-7
- 638 Burgess, N., Maguire, E., & O'Keefe, J. (2002). The Human Hippocampus and Spatial and Episodic Memory. *Neuron*, 35(4), 625–641.  
639 doi: [https://doi.org/10.1016/S0896-6273\(02\)00830-9](https://doi.org/10.1016/S0896-6273(02)00830-9)
- 640 Chang, C. J., & Jazayeri, M. (2018). Integration of speed and time for estimating time to contact. *Proceedings of the National Academy of*  
641 *Sciences of the United States of America*, 115(12), E2879–E2887. doi: 10.1073/pnas.1713316115
- 642 Cheng, D. T., Disterhoft, J. F., Power, J. M., Ellis, D. A., & Desmond, J. E. (2008). Neural substrates underlying human delay and trace  
643 eyeblink conditioning. *Proceedings of the National Academy of Sciences of the United States of America*, 105(23), 8108–8113. doi:  
644 10.1073/pnas.0800374105
- 645 Chersi, F., & Burgess, N. (2015). The Cognitive Architecture of Spatial Navigation: Hippocampal and Striatal Contributions. *Neuron*,  
646 88(1), 64–77. doi: 10.1016/j.neuron.2015.09.021
- 647 Cicchini, G. M., Arrighi, R., Cecchetti, L., Giusti, M., & Burr, D. C. (2012). Optimal Encoding of Interval Timing in Expert Percussionists.  
648 *Journal of Neuroscience*, 32(3), 1056–1060. doi: 10.1523/JNEUROSCI.3411-11.2012
- 649 Cohen, M. X., & Ranganath, C. (2007). Reinforcement learning signals predict future decisions. *Journal of Neuroscience*, 27(2), 371–378.  
650 doi: 10.1523/JNEUROSCI.4421-06.2007
- 651 Cox, J., & Witten, I. B. (2019). Striatal circuits for reward learning and decision-making. *Nature Reviews Neuroscience*, 20(8), 482–494.  
652 doi: 10.1038/s41583-019-0189-2
- 653 Daw, N. D., & Dayan, P. (2014). The algorithmic anatomy of model-based evaluation. *Philosophical Transactions of the Royal Society B:*  
654 *Biological Sciences*, 369(1655), 20130478. doi: 10.1098/rstb.2013.0478
- 655 de Azevedo Neto, R. M., & Amaro Júnior, E. (2018). Bilateral dorsal fronto-parietal areas are associated with integration of visual  
656 motion information and timed motor action. *Behavioural Brain Research*, 337, 91–98. doi: 10.1016/j.bbr.2017.09.046
- 657 Deuker, L., Bellmund, J., Navarro Schröder, T., & Doeller, C. F. (2016). An event map of memory space in the hippocampus. *eLife*, 5,  
658 e16534. doi: 10.7554/eLife.16534
- 659 Dickerson, K. C., & Delgado, M. R. (2015). Contributions of the hippocampus to feedback learning. *Cognitive, Affective, & Behavioral*  
660 *Neuroscience*, 15(4), 861–877. doi: 10.3758/s13415-015-0364-5
- 661 Doeller, C. F., King, J. A., & Burgess, N. (2008). Parallel striatal and hippocampal systems for landmarks and boundaries in spatial  
662 memory. *Proceedings of the National Academy of Sciences of the United States of America*, 105(15), 5915–5920. doi: 10.1073/pnas  
663 .0801489105
- 664 Eichenbaum, H. (2014). Time cells in the hippocampus: A new dimension for mapping memories. *Nature Reviews Neuroscience*, 15(11),  
665 732–744. doi: 10.1038/nrn3827
- 666 Eichenbaum, H. (2017). On the Integration of Space, Time, and Memory. *Neuron*, 95(5), 1007–1018. doi: 10.1016/j.neuron.2017.06.036
- 667 Epstein, R. A., & Baker, C. I. (2019). Scene Perception in the Human Brain. *Annual Review of Vision Science*, 5(1), 373–397. doi: 10.1146/  
668 annurev-vision-091718-014809
- 669 Foerde, K., & Shohamy, D. (2011). Feedback timing modulates brain systems for learning in humans. *Journal of Neuroscience*, 31(37),  
670 13157–13167. doi: 10.1523/JNEUROSCI.2701-11.2011
- 671 Friston, K., FitzGerald, T., Rigoli, F., Schwartenbeck, P., & Pezzulo, G. (2016). Active inference: a process theory. *Neural Computation*,  
672 29(1), 1–49. doi: 10.1162/NECO\_a\_00912

- 673 Gahnstrom, C. J., & Spiers, H. J. (2020). Striatal and hippocampal contributions to flexible navigation in rats and humans. *Brain and*  
674 *Neuroscience Advances*, 4, 239821282097977. doi: 10.1177/2398212820979772
- 675 Gauthier, B., Pestke, K., & van Wassenhove, V. (2019). Building the Arrow of Time... Over Time: A Sequence of Brain Activity Mapping  
676 Imagined Events in Time and Space. *Cerebral Cortex*, 29(10), 4398–4414. doi: 10.1093/cercor/bhy320
- 677 Gauthier, B., Prabhu, P., Kotegar, K. A., & van Wassenhove, V. (2020). Hippocampal contribution to ordinal psychological time in the  
678 human brain. *Journal of Cognitive Neuroscience*, 32(11), 2071–2086. doi: 10.1162/jocn\_a\_01586
- 679 Geerts, J. P., Chersi, F., Stachenfeld, K. L., & Burgess, N. (2020). A general model of hippocampal and dorsal striatal learning and  
680 decision making. *Proceedings of the National Academy of Sciences of the United States of America*, 117(49), 31427–31437. doi: 10.1073/  
681 pnas.2007981117
- 682 Gershman, S. J., Moustafa, A. A., & Ludvig, E. A. (2014). Time representation in reinforcement learning models of the basal ganglia.  
683 *Frontiers in Computational Neuroscience*, 7(JAN). doi: 10.3389/fncom.2013.00194
- 684 Gibbon, J. (1977). Scalar expectancy theory and Weber's law in animal timing. *Psychological Review*, 84(3), 279–325. doi: 10.1037/  
685 0033-295X.84.3.279
- 686 Goodroe, S. C., Starnes, J., & Brown, T. I. (2018). The Complex Nature of Hippocampal-Striatal Interactions in Spatial Navigation.  
687 *Frontiers in Human Neuroscience*, 12. doi: 10.3389/fnhum.2018.00250
- 688 Gouvêa, T. S., Monteiro, T., Motiwala, A., Soares, S., Machens, C., & Paton, J. J. (2015). Striatal dynamics explain duration judgments.  
689 *eLife*, 4(December2015), e11386. doi: 10.7554/eLife.11386
- 690 Howard, M. W. (2017). Temporal and spatial context in the mind and brain. *Current Opinion in Behavioral Sciences*, 17, 14–19. doi:  
691 10.1016/j.cobeha.2017.05.022
- 692 Huang, Y., & Rao, R. P. (2011). Predictive coding. *Wiley Interdisciplinary Reviews: Cognitive Science*, 2(5), 580–593. doi: 10.1002/wcs.142
- 693 Jazayeri, M., & Shadlen, M. N. (2010). Temporal context calibrates interval timing. *Nature Neuroscience*, 13(8), 1020–1026. doi: 10.1038/  
694 nn.2590
- 695 Kaplan, R., Schuck, N. W., & Doeller, C. F. (2017). The Role of Mental Maps in Decision-Making. *Trends in Neurosciences*, 40(5), 256–259.  
696 doi: 10.1016/j.tins.2017.03.002
- 697 Kragel, J. E., Schuele, S., VanHaerents, S., Rosenow, J. M., & Voss, J. L. (2021). Rapid coordination of effective learning by the human  
698 hippocampus. *Science Advances*, 7(25). doi: 10.1126/sciadv.abf7144
- 699 Kumaran, D. (2012). What representations and computations underpin the contribution of the hippocampus to generalization and  
700 inference? *Frontiers in Human Neuroscience*, 6. doi: 10.3389/fnhum.2012.00157
- 701 Lee, D., Seo, H., & Jung, M. W. (2012). Neural basis of reinforcement learning and decision making. *Annual Review of Neuroscience*, 35,  
702 287–308. doi: 10.1146/annurev-neuro-062111-150512
- 703 LeGates, T. A., Kvarta, M. D., Tooley, J. R., Francis, T. C., Lobo, M. K., Creed, M. C., & Thompson, S. M. (2018). Reward behaviour is  
704 regulated by the strength of hippocampus–nucleus accumbens synapses. *Nature*, 564(7735), 258–262. doi: 10.1038/s41586-018  
705 -0740-8
- 706 MacDonald, C. J., Lepage, K. Q., Eden, U. T., & Eichenbaum, H. (2011). Hippocampal "time cells" bridge the gap in memory for discon-  
707 tinuous events. *Neuron*, 71(4), 737–749. doi: 10.1016/j.neuron.2011.07.012
- 708 Meck, W. H., Church, R. M., & Olton, D. S. (1984). Hippocampus, time, and memory. *Behavioral Neuroscience*, 98(1), 3–22. doi:  
709 10.1037/0735-7044.98.1.3
- 710 Mello, G. B., Soares, S., & Paton, J. J. (2015). A scalable population code for time in the striatum. *Current Biology*, 25(9), 1113–1122. doi:  
711 10.1016/j.cub.2015.02.036
- 712 Momennejad, I. (2020). Learning Structures: Predictive Representations, Replay, and Generalization. *Current Opinion in Behavioral*  
713 *Sciences*, 32, 155–166. doi: 10.1016/j.cobeha.2020.02.017
- 714 Montchal, M. E., Reagh, Z. M., & Yassa, M. A. (2019). Precise temporal memories are supported by the lateral entorhinal cortex in  
715 humans. *Nature Neuroscience*, 22(2), 284–288. doi: 10.1038/s41593-018-0303-1
- 716 Nau, M., Julian, J. B., & Doeller, C. F. (2018). How the Brain's Navigation System Shapes Our Visual Experience. *Trends in Cognitive*  
717 *Sciences*, 22(9), 810–825. doi: 10.1016/j.tics.2018.06.008
- 718 Nau, M., Navarro Schröder, T., Bellmund, J., & Doeller, C. F. (2018a). Hexadirectional coding of visual space in human entorhinal cortex.  
719 *Nature Neuroscience*, 21(2), 188–190. doi: 10.1038/s41593-017-0050-8
- 720 Nobre, A. C., & van Ede, F. (2018). Anticipated moments: temporal structure in attention. *Nature Reviews Neuroscience*, 19(1). doi:  
721 10.1038/nrn.2017.141
- 722 O'Reilly, J. X., Mesulam, M. M., & Nobre, A. C. (2008). The Cerebellum Predicts the Timing of Perceptual Events. *Journal of Neuroscience*,  
723 28(9), 2252–2260. (Publisher: Society for Neuroscience Section: Articles) doi: 10.1523/JNEUROSCI.2742-07.2008
- 724 Palombo, D. J., & Verfaellie, M. (2017). Hippocampal contributions to memory for time: evidence from neuropsychological studies.  
725 *Current Opinion in Behavioral Sciences*, 17, 107–113. doi: 10.1016/j.cobeha.2017.07.015

- 726 Paton, J. J., & Buonomano, D. V. (2018). The Neural Basis of Timing: Distributed Mechanisms for Diverse Functions. *Neuron*, 98(4),  
727 687–705. doi: 10.1016/j.neuron.2018.03.045
- 728 Peer, M., Brunec, I. K., Newcombe, N. S., & Epstein, R. A. (2021). Structuring Knowledge with Cognitive Maps and Cognitive Graphs.  
729 *Trends in Cognitive Sciences*, 25(1), 37–54. doi: 10.1016/j.tics.2020.10.004
- 730 Petter, E. A., Gershman, S. J., & Meck, W. H. (2018). Integrating Models of Interval Timing and Reinforcement Learning. *Trends in*  
731 *Cognitive Sciences*, 22(10), 911–922. doi: 10.1016/j.tics.2018.08.004
- 732 Petzschner, F. H., & Glasauer, S. (2011). Iterative Bayesian Estimation as an Explanation for Range and Regression Effects: A Study on  
733 Human Path Integration. *Journal of Neuroscience*, 31(47), 17220–17229. doi: 10.1523/JNEUROSCI.2028-11.2011
- 734 Petzschner, F. H., Glasauer, S., & Stephan, K. E. (2015). A Bayesian perspective on magnitude estimation. *Trends in Cognitive Sciences*,  
735 19(5), 285–293. doi: 10.1016/j.tics.2015.03.002
- 736 Poppenk, J., Evensmoen, H. R., Moscovitch, M., & Nadel, L. (2013). Long-axis specialization of the human hippocampus. *Trends in*  
737 *Cognitive Sciences*, 17(5), 230–240. doi: 10.1016/j.tics.2013.03.005
- 738 Rakitin, B. C., Penney, T. B., Gibbon, J., Malapani, C., Hinton, S. C., & Meck, W. H. (1998). Scalar expectancy theory and peak-interval  
739 timing in humans. *Journal of Experimental Psychology: Animal Behavior Processes*, 24(1), 15–33. doi: 10.1037/0097-7403.24.1.15
- 740 Richards, W. (1973). Time reproductions by H.M. *Acta Psychologica*, 37(4), 279–282. doi: 10.1016/0001-6918(73)90020-6
- 741 Roach, N. W., McGraw, P. V., Whitaker, D. J., & Heron, J. (2017). Generalization of prior information for rapid Bayesian time estimation.  
742 *Proceedings of the National Academy of Sciences*, 114(2). doi: 10.1073/pnas.1610706114
- 743 Schapiro, A. C., Turk-Browne, N. B., Botvinick, M. M., & Norman, K. A. (2017). Complementary learning systems within the hippocampus:  
744 a neural network modelling approach to reconciling episodic memory with statistical learning. *Philosophical Transactions of the Royal*  
745 *Society B: Biological Sciences*, 372(1711), 20160049. doi: 10.1098/rstb.2016.0049
- 746 Schiller, D., Eichenbaum, H., Buffalo, E. A., Davachi, L., Foster, D. J., Leutgeb, S., & Ranganath, C. (2015). Memory and space: Towards  
747 an understanding of the cognitive map. *Journal of Neuroscience*, 35(41), 13904–13911. doi: 10.1523/JNEUROSCI.2618-15.2015
- 748 Schlichting, M. L., & Preston, A. R. (2015). Memory integration: neural mechanisms and implications for behavior. *Current Opinion in*  
749 *Behavioral Sciences*, 1, 1–8. doi: 10.1016/j.cobeha.2014.07.005
- 750 Schönberg, T., Daw, N. D., Joel, D., & O'Doherty, J. P. (2007). Reinforcement learning signals in the human striatum distinguish learners  
751 from nonlearners during reward-based decision making. *Journal of Neuroscience*, 27(47), 12860–12867. doi: 10.1523/JNEUROSCI  
752 .2496-07.2007
- 753 Schuck, N. W., & Niv, Y. (2019). Sequential replay of nonspatial task states in the human hippocampus. *Science*, 364(6447). doi:  
754 10.1126/science.aaw5181
- 755 Shikano, Y., Ikegaya, Y., & Sasaki, T. (2021). Minute-encoding neurons in hippocampal-striatal circuits. *Current Biology*, 0(0), 1438-  
756 1449.e6. doi: 10.1016/j.cub.2021.01.032
- 757 Shimbo, A., Izawa, E.-I., & Fujisawa, S. (2021). Scalable representation of time in the hippocampus. *Science Advances*, 7(6), eabd7013.  
758 doi: 10.1126/sciadv.abd7013
- 759 Shohamy, D., & Wagner, A. D. (2008). Integrating Memories in the Human Brain: Hippocampal-Midbrain Encoding of Overlapping  
760 Events. *Neuron*, 60(2), 378–389. doi: 10.1016/j.neuron.2008.09.023
- 761 Thavabalasingam, S., O'Neil, E. B., & Lee, A. C. (2018). Multivoxel pattern similarity suggests the integration of temporal duration in  
762 hippocampal event sequence representations. *NeuroImage*, 178, 136–146. doi: 10.1016/j.neuroimage.2018.05.036
- 763 Thavabalasingam, S., O'Neil, E. B., Tay, J., Nestor, A., & Lee, A. C. (2019). Evidence for the incorporation of temporal duration information  
764 in human hippocampal long-term memory sequence representations. *Proceedings of the National Academy of Sciences of the United*  
765 *States of America*, 116(13), 6407–6414. doi: 10.1073/pnas.1819993116
- 766 Umbach, G., Kantak, P., Jacobs, J., Kahana, M., Pfeiffer, B. E., Sperling, M., & Lega, B. (2020). Time cells in the human hippocampus and  
767 entorhinal cortex support episodic memory. *Proceedings of the National Academy of Sciences of the United States of America*, 117(45),  
768 28463–28474. doi: 10.1073/pnas.2013250117
- 769 Vikbladh, O. M., Meager, M. R., King, J., Blackmon, K., Devinsky, O., Shohamy, D., ... Daw, N. D. (2019). Hippocampal Contributions to  
770 Model-Based Planning and Spatial Memory. *Neuron*, 102(3), 683–693.e4. doi: 10.1016/j.neuron.2019.02.014
- 771 Wang, J., Narain, D., Hosseini, E. A., & Jazayeri, M. (2018). Flexible timing by temporal scaling of cortical responses. *Nature Neuroscience*,  
772 21(1), 102–112. doi: 10.1038/s41593-017-0028-6
- 773 Whittington, J. C. R., Muller, T. H., Mark, S., Chen, G., Barry, C., Burgess, N., & Behrens, T. E. J. (2020). The Tolman-Eichenbaum  
774 Machine: Unifying Space and Relational Memory through Generalization in the Hippocampal Formation. *Cell*, 183(5). doi: 10.1016/  
775 j.cell.2020.10.024
- 776 Wiener, M., Michaelis, K., & Thompson, J. C. (2016). Functional correlates of likelihood and prior representations in a virtual distance  
777 task. *Human Brain Mapping*, 37(9), 3172–3187. doi: 10.1002/hbm.23232
- 778 Wikenheiser, A. M., Marrero-Garcia, Y., & Schoenbaum, G. (2017). Suppression of Ventral Hippocampal Output Impairs Integrated  
779 Orbitofrontal Encoding of Task Structure. *Neuron*, 95(5), 1197–1207.e3. doi: 10.1016/j.neuron.2017.08.003

780 Wimmer, G. E., Daw, N. D., & Shohamy, D. (2012). Generalization of value in reinforcement learning by humans. *European Journal of*  
781 *Neuroscience*, 35(7), 1092–1104. doi: 10.1111/j.1460-9568.2012.08017.x

782 Wirth, S., Avsar, E., Chiu, C. C., Sharma, V., Smith, A. C., Brown, E., & Suzuki, W. A. (2009). Trial Outcome and Associative Learning  
783 Signals in the Monkey Hippocampus. *Neuron*, 61(6), 930–940. doi: 10.1016/j.neuron.2009.01.012

784 Wittmann, B. C., Schott, B. H., Guderian, S., Frey, J. U., Heinze, H. J., & Düzel, E. (2005). Reward-related fMRI activation of dopaminergic  
785 midbrain is associated with enhanced hippocampus-dependent long-term memory formation. *Neuron*, 45(3), 459–467. doi: 10  
786 .1016/j.neuron.2005.01.010

787 Wolpert, D. M., Diedrichsen, J., & Flanagan, J. R. (2011). Principles of sensorimotor learning. *Nature Reviews Neuroscience*, 12(12),  
788 739–751. doi: 10.1038/nrn3112

789 World Medical Association. (2013). World Medical Association Declaration of Helsinki: Ethical Principles for Medical Research Involving  
790 Human Subjects. *JAMA*, 310(20), 2191–2194. doi: 10.1001/jama.2013.281053

791 Yin, B., & Troger, A. B. (2011). Exploring the 4th dimension: Hippocampus, time, and memory revisited. *Frontiers in Integrative*  
792 *Neuroscience*, 5. doi: 10.3389/fnint.2011.00036

# Supplementary Material

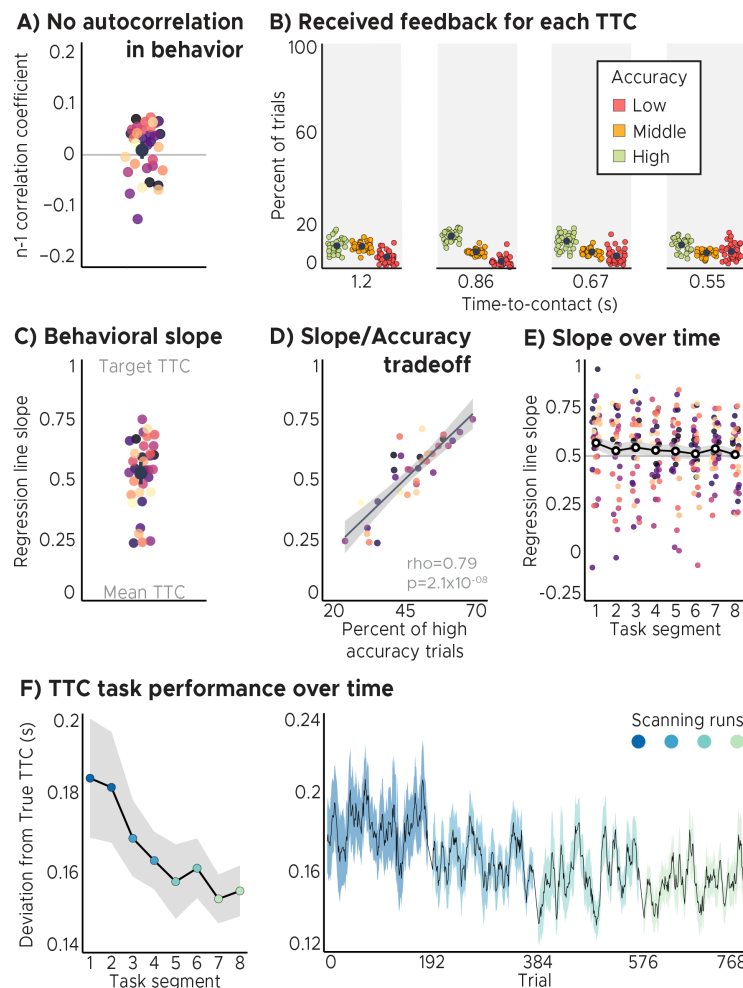

**Figure S1: Behavioral analyses.** A) No autocorrelation in the behavioral feedback over trials. The feedback in one trial did not predict feedback in the following trial. Displayed values correspond to the Pearson n-1 correlation coefficient. B) Feedback distributions for all speed levels. Participants received approximately the same feedback for all speed levels/target TTCs. C) Behavioral regression effect. We plot linear regression-line slopes predicting estimated TTCs as a function of target TTCs for each participant. A slope of 1 indicates perfect performance. A slope of 0 indicates that participants always gave the same response independent of the target TTC. We found that the slope coefficients clustered at around 0.5, suggesting that participants' responses were biased towards the mean of the sampled intervals. ABC) Depicted are the mean and SEM across participants (black dot and line) overlaid on single participant data (dots). D) Performance trade-off between the regression effect and TTC accuracy. Participants with higher TTC accuracy exhibited a weaker regression effect, reflected in larger regression-line slopes (same data as in C). Each dot represents a single participant. Regression line (black) and SEM (gray shade) were added. E) Behavioral regression effect over time. Participants' slope coefficients converged towards the value of 0.5 as they progressed through the task. Each dot represents a single participant. Mean (black and white dot) and SEM (gray shade) were added. ACDE) Participants were color coded. F) TTC task performance over time. Left panel: Across-trial-average performance over task segments. Right panel: task performance over trials. We plot the mean (black line) and SEM (shaded area) across participants. Run identity color coded. Participants' task performance improved over time.

### A) Hippocampal regions of interest

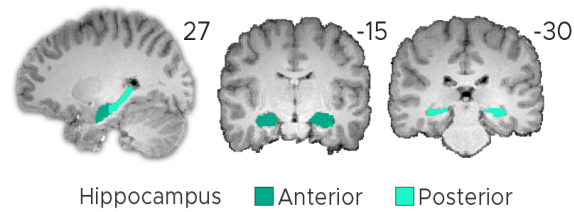

### B) Subcortical regions of interest

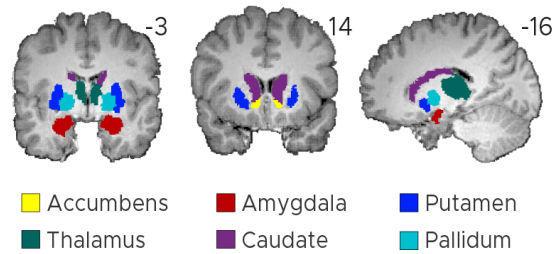

**Figure S2: Regions of interest (ROIs). A) Anterior and posterior hippocampal ROIs. B) Subcortical regions-of-interest (ROIs) for the nucleus accumbens, the amygdala, the thalamus, the caudate, the putamen and the pallidum. AB) ROIs shown for a sample participant superimposed onto the skull-stripped structural T1-scan of that participant. These masks were created using FreeSurfer's cortical and subcortical parcellation.**

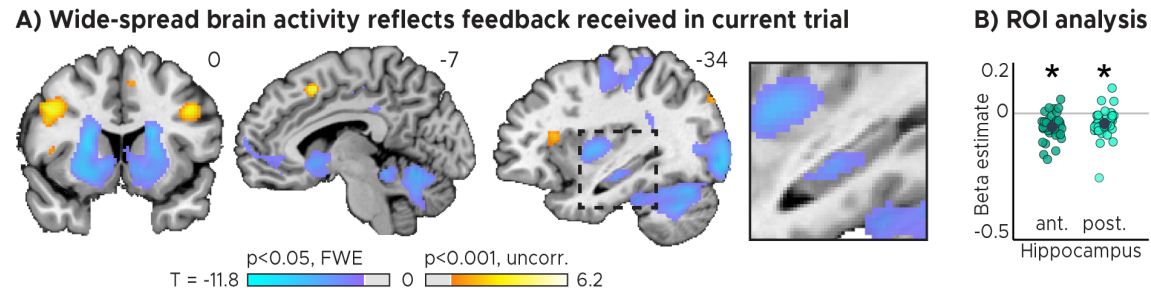

**Figure S3: Brain regions signalling behavioral feedback in current trial.** Activity in each trial was modeled parametrically as a function of the feedback received at the end of the trial. **A)** Voxel-wise analysis. We plot thresholded t-test results at 1 mm resolution overlaid on a structural template brain. MNI coordinates and insert zooming in on the hippocampus added. A large network of regions signalling TTC performance included the hippocampus, striatum and cerebellum. **B)** Independent regions-of-interest analysis for the anterior (ant.) and posterior (post.) hippocampus. We plot the beta estimate obtained for the parametric modulator modeling trial-wise activity as a function of task performance. Negative values indicate that smaller errors, and higher-accuracy feedback, led to stronger activity. Depicted are the means and SEM across participants (black dot and line) overlaid on single participant data (coloured dots). Statistics reflect  $p < 0.05$  at Bonferroni-corrected levels (\*) obtained using a group-level two-tailed one-sample t-test against zero.

## A) Distinct networks update TTC-specific or TTC-independent task information

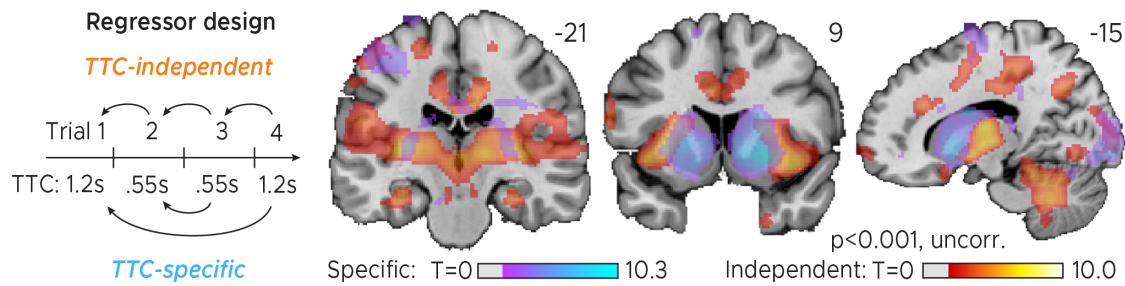

## B) Subcortical regions

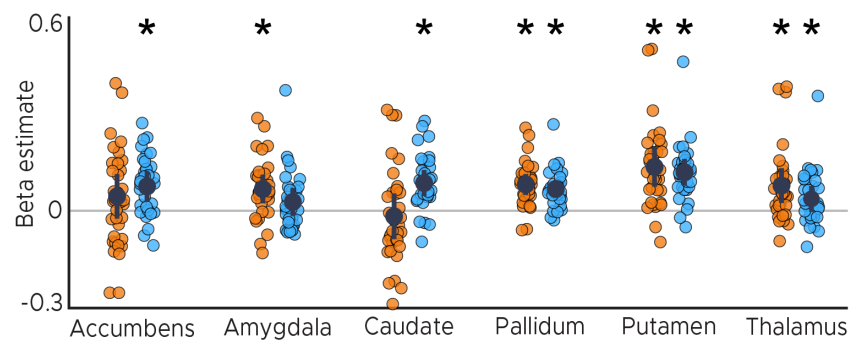

**Figure S4: Distinct networks support TTC-specific and TTC-independent updating.** A) Voxel-wise mass-univariate GLM results for TTC-independent and TTC-specific parametric regressors. We plot thresholded t-test results at 1mm resolution. Activity maps were overlaid on a structural template brain. Positive t-scores indicate a relationship between brain activity and the updating of either TTC-specific or TTC-independent information respectively. B) ROI-analysis results for subcortical regions for TTC-independent (orange dots) and TTC-specific regressors (blue dots). Depicted are the mean and SEM across participants (black dot and line) overlaid on single participant data. Statistics reflect  $p < 0.05$  at Bonferroni-corrected levels (\*) obtained using a group-level one-tailed one-sample t-test against zero.

### A) TTC-independent hippocampal connectivity to subcortex

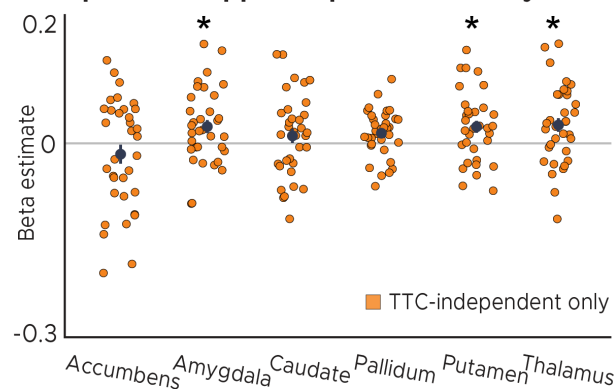

### B) Whole-brain TTC-independent hippocampal connectivity

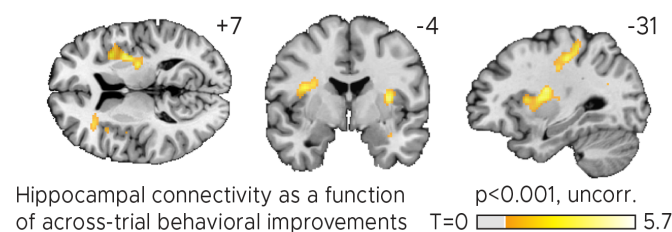

**Figure S5: TTC-independent hippocampal connectivity.** A) Regions of interest analysis for subcortical regions estimated using a Psychophysiological-interactions (PPI) analysis conducted using the hippocampal effect in Fig. 3A as a seed. Positive beta estimates indicate that functional connectivity between each ROI and the hippocampal seed depended on how much participants TTC-task performance improved across trials. Depicted are the mean and SEM across participants (black dot and line) overlaid on single participant data for the nucleus accumbens, the amygdala, the caudate, the globus pallidum, the putamen and the thalamus. Statistics reflect  $p < 0.05$  at Bonferroni-corrected levels (\*) obtained using a group-level one-tailed one-sample t-test against zero. B) Whole-brain voxel-wise t-test results for the TTC-independent hippocampal connectivity overlaid on a structural template brain at 1mm resolution. MNI coordinates added.

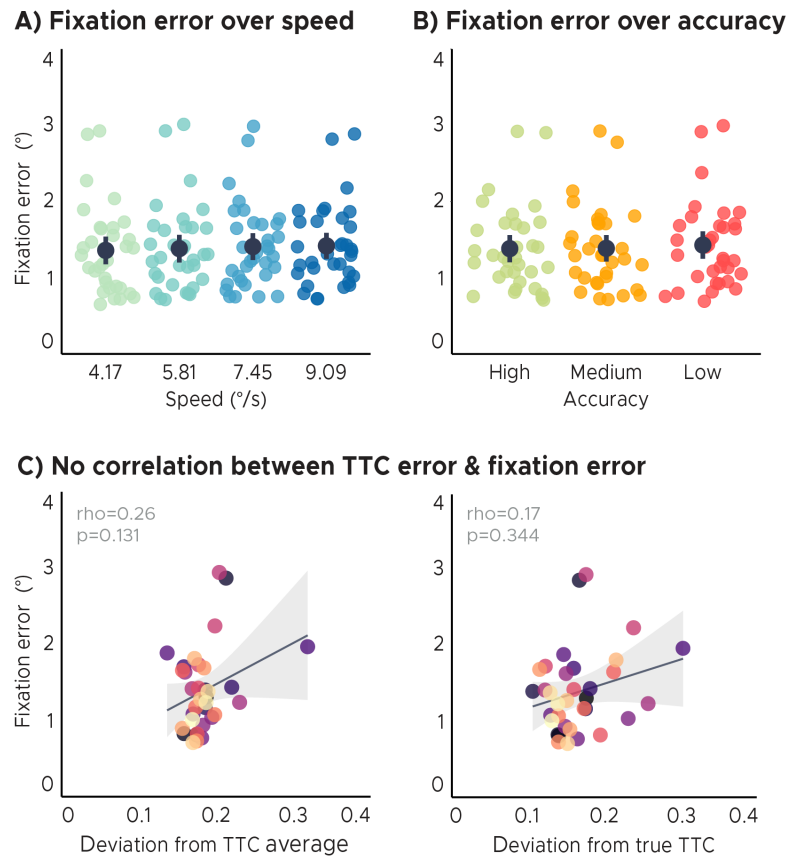

**Figure S6: Eye tracking analyses.** A) Fixation error over speed. There were no significant differences in fixation error across speed levels/target TTC's. B) Fixation error over TTC-task accuracy. There were no significant differences in fixation error across TTC-task accuracy levels. C) No correlation of the behavioral regression-to-the-mean effect or TTC-task performance with fixation error. Fixation quality does not affect the interpretation of the imaging results presented in this study. Each dot represents a single participant. Participants were color coded. Regression line (black) and standard error (gray shade). AB) Group-level mean and SEM depicted as black dot and line overlaid on single participant data.
